# Supplementary material for: Synergistic solar-powered water-electricity generation via rational integration of semitransparent photovoltaics and interfacial steam generators
Source: Royal Society of Chemistry journal article supplement (doi:10.1039/d1ta06255g), 2021-01-01
Supplement: d1ta06255g1.pdf [file d1ta06255g1.pdf]

## Electronic Supplementary Information (ESI)

### Synergistic Solar-Powered Water-Electricity Generation via Rational Integration of Semitransparent Photovoltaics and Interfacial Steam Generators

Qing Ji,<sup>a</sup> Na Li,<sup>a</sup> Shuxue Wang,<sup>a</sup> Shuai Li,<sup>a</sup> Fangbin Li,<sup>a</sup> Liangmin Yu,<sup>b,c</sup> Petri Murto<sup>\*,d</sup> & Xiaofeng Xu<sup>\*,a</sup>

<sup>a</sup> College of Materials Science and Engineering, Ocean University of China, Qingdao 266100, China.

<sup>b</sup> Key Laboratory of Marine Chemistry Theory and Technology, Ministry of Education, Ocean University of China, Qingdao 266100, China.

<sup>c</sup> Open Studio for Marine Corrosion and Protection, Pilot National Laboratory for Marine Science and Technology, Qingdao 266237, China.

<sup>d</sup> Department of Chemistry, University of Cambridge, Cambridge, CB2 1EW, United Kingdom.

\* Corresponding authors: X. Xu, email: xuxiaofeng@ouc.edu.cn

P. Murto, email: pm707@cam.ac.uk

## Table of Contents

|                                                                            |     |
|----------------------------------------------------------------------------|-----|
| 1. Materials .....                                                         | S3  |
| 2. Material characterization .....                                         | S3  |
| 3. Fabrication of P-NC films.....                                          | S4  |
| 4. Water diffusion characterization .....                                  | S4  |
| 5. Fourier transform infrared (FTIR) characterization.....                 | S4  |
| 6. Thermogravimetric analysis (TGA).....                                   | S5  |
| 7. Durability tests of P-NC films .....                                    | S5  |
| 8. Scanning electron microscope (SEM) characterization.....                | S6  |
| 9. Porosity characterization.....                                          | S7  |
| 10. X-ray photoelectron spectroscopy (XPS) measurements .....              | S7  |
| 11. Water contact angle (CA) measurements.....                             | S8  |
| 12. Thermal conductivity measurements .....                                | S8  |
| 13. Tensile stress–strain measurements .....                               | S9  |
| 14. Transmittance spectra of materials .....                               | S9  |
| 15. Fabrication of opaque PSCs and ST-PSCs .....                           | S10 |
| 16. Device structures and SEM images .....                                 | S10 |
| 17. CIE chromaticity diagram.....                                          | S11 |
| 18. Water evaporation rates and photothermal conversion efficiencies ..... | S11 |
| 19. Water evaporation characterization in the dark.....                    | S12 |
| 20. Summary of synergistic water-electricity production.....               | S13 |
| 21. Long-term water evaporation measurements.....                          | S14 |
| 22. Stability characterization of ST-PSC .....                             | S14 |
| 23. Biofouling characterization.....                                       | S15 |
| 24. Salt rejection characterization.....                                   | S15 |
| 25. ICP-MS measurements .....                                              | S16 |
| 26. Solar energy transfer and energy loss characterization.....            | S16 |
| 27. Reflectance spectra of devices .....                                   | S18 |
| 28. Transmittance spectra of ITO and Ag electrodes .....                   | S18 |
| 29. Water evaporation measurements of ST-PSC/P-NC2. ....                   | S19 |
| 30. Solar energy budgets in ST-PSC/P-NC2 .....                             | S19 |
| 31. Near-infrared (IR) images.....                                         | S20 |
| 32. Reference .....                                                        | S20 |

## 1. Materials

The donor poly[(2,6-(4,8-bis(5-(2-ethylhexyl-3-fluoro) thiophen-2-yl)-benzo[1,2-b:4,5-b'] dithiophene))-alt-(5,5-(1',3'-di-2-thienyl-5',7'-bis(2-ethylhexyl) benzo [1',2'-c:4',5'-c'] dithiophene-4,8-dione)] (PM6) was prepared according to the previous literature.<sup>1,2</sup> The small-molecule acceptor Y6 was purchased from Solarmer Energy, Inc., China. Ferric chloride hexahydrate ( $\text{FeCl}_3 \cdot 6\text{H}_2\text{O}$ ) was purchased from Shanghai Macklin Biochemical Co., Ltd, China. Pyrrole was purchased from Mreda Technology, Inc., China.

## 2. Material characterization

Density and porosity were measured by using a high-precision density meter (AU-120PF, Quarrz). Morphologies and elemental mapping were characterized by a scanning electron microscope (VEGA3, TESCAN) in combination with an energy dispersive X-ray spectrometry. 3D optical microscope images were characterized via a 3D laser scanning confocal microscope (VK-X260K, Keyence). X-ray photoelectron spectroscopy (XPS) spectra were measured with a XPS spectrometer (Thermo Kalpha). Surface wettability was evaluated by an optical contact angle meter (CA, JC2000DM, POWEREACH) combined with a camera. Absorption spectra were measured with a UV–Vis–NIR absorption spectrometer (SHIMADZU UV2600). Tensile stress–strain curve was measured using a mechanical testing system equipped with a digital force gauge (M5-100, MARK-10) and a force test stand (ESM303, MARK-10). Bacteriostatic tests were measured by using a CytoFLEX flow cytometer (A00-1-1102).

### 3. Fabrication of P-NC films

Cellulosic nonwoven fabrics were rinsed with acetone and deionized water, and air-dried for 24 h. After that, the nonwoven fabrics were immersed into a  $\text{FeCl}_3 \cdot 6\text{H}_2\text{O}$  solution (1 mol/L) for 1 h, and then immersed into a pyrrole solution (0.2 mol/L) and vibrated via a benchtop orbital shaker for 12 h. Finally, polypyrrole (PPy)-modified nonwoven fabrics (P-NC) were obtained and washed with deionized water to remove all reagent and catalyst.

### 4. Water diffusion characterization

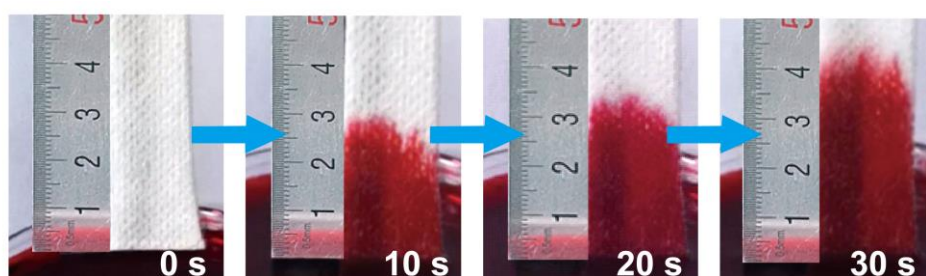

**Figure S1.** Water diffusion characterization of cellulosic nonwoven fabrics (or named NC film).

### 5. Fourier transform infrared (FTIR) characterization

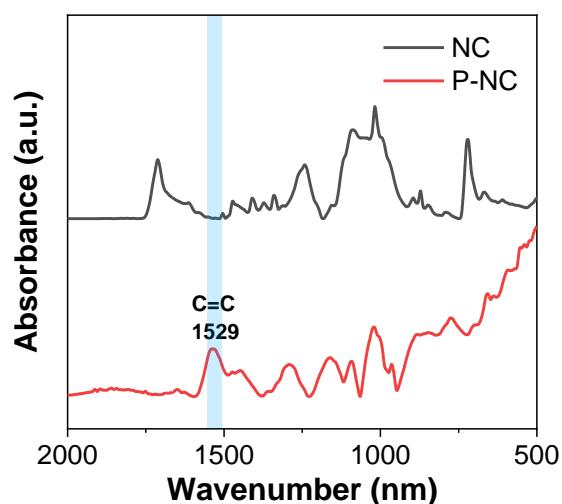

**Figure S2.** FTIR spectra of NC and P-NC films.

The peak at  $1529\text{ cm}^{-1}$  corresponds to the C=C stretching of pyrrole rings, which is absent in the neat NC film.<sup>3</sup>

## 6. Thermogravimetric analysis (TGA)

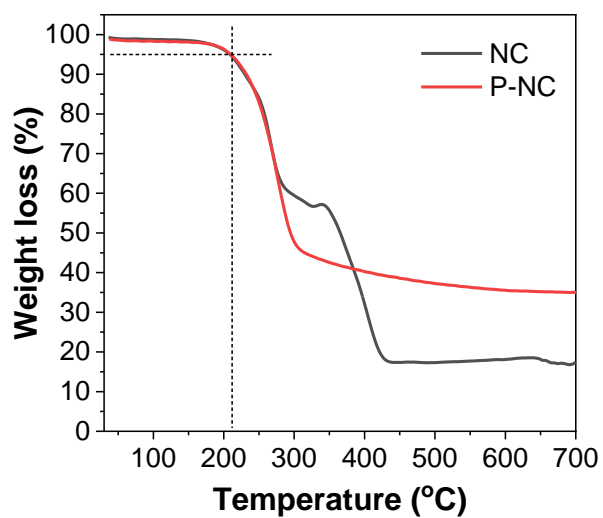

**Figure S3.** TGA traces of NC and P-NC films (the dotted line illustrates the temperature at 5% weight loss).

## 7. Durability tests of P-NC films

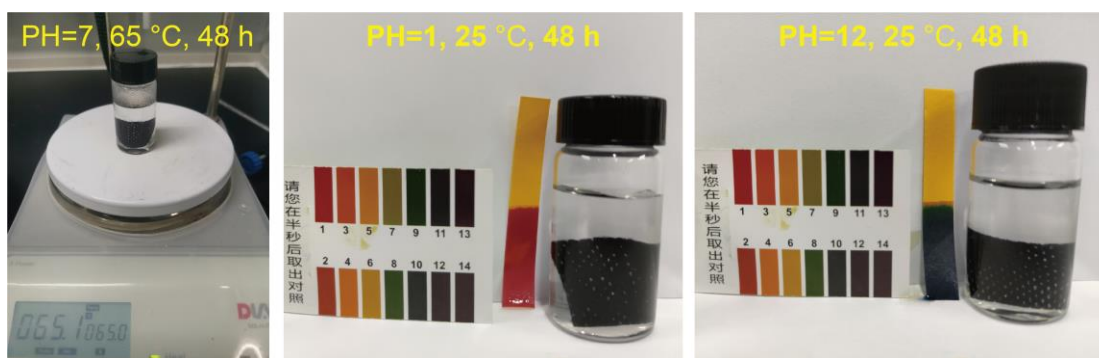

**Figure S4.** Digital photographs of P-NC films after soaking in hot, acidic and alkaline water.

## 8. Scanning electron microscope (SEM) characterization

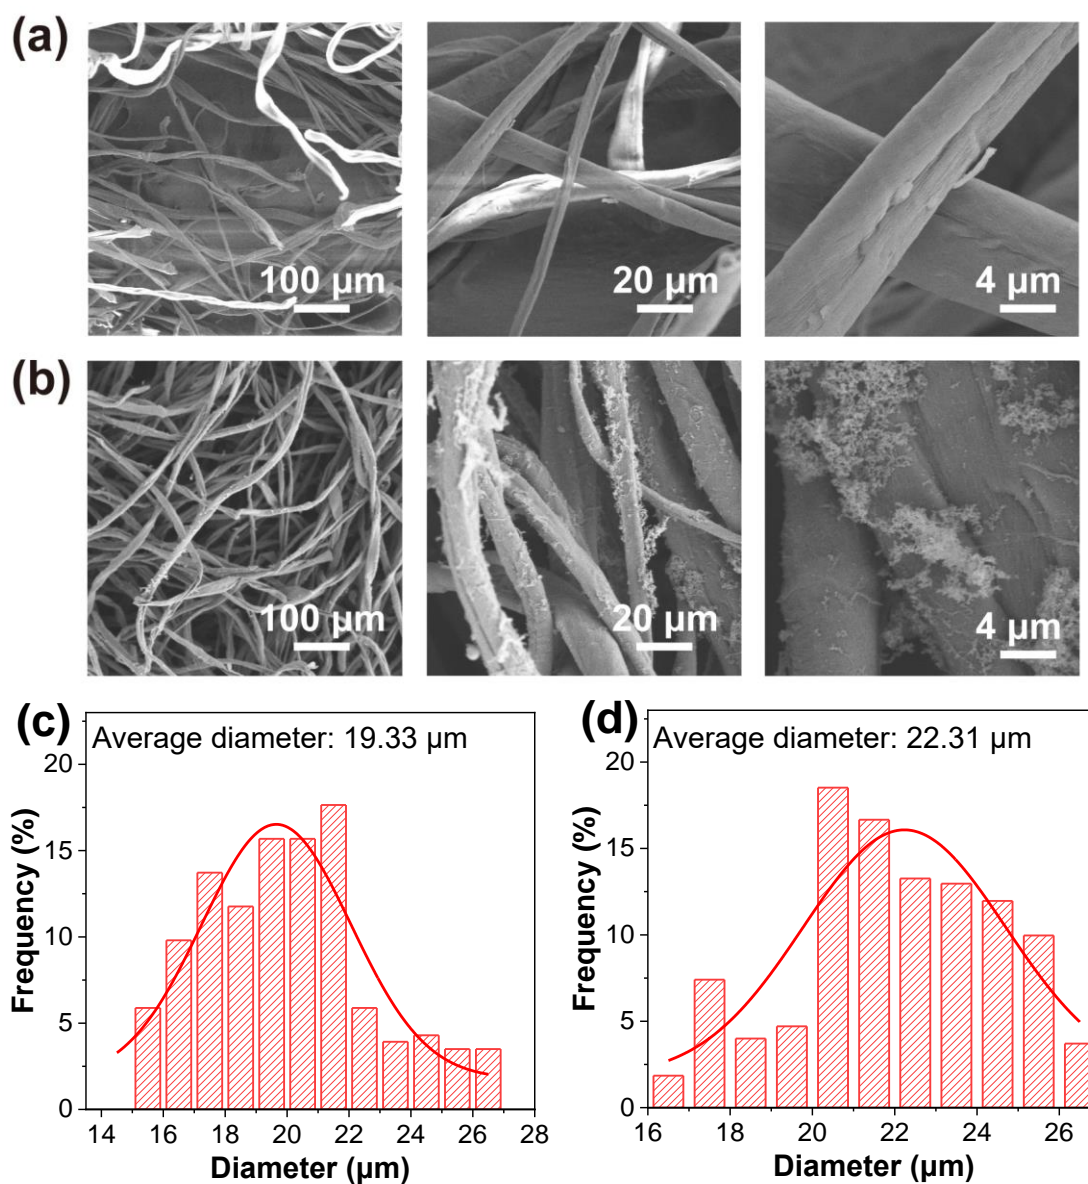

**Figure S5.** Cross-sectional SEM images of (a) NC films and (b) P-NC films. Corresponding diameter statistical distribution histograms of (c) NC films and (d) P-NC films.

## 9. Porosity characterization

Porosity ( $P$ ) refers to the percentage of pore volume to total volume of an aerogel. Based on Archimedes' law, it can be calculated by using Equation S1,

$$P = \frac{V_{pore}}{V_{pore} + V_{displaced}} = \frac{m_2 - m_1}{m_2 - m_1 + \frac{F_b}{g}} \quad (S1)$$

where  $m_1$  and  $m_2$  are dry and water-saturated weights of film, respectively.  $F_b$  is buoyant force of film, which can be measured by a density meter, and  $g$  is the gravitational acceleration ( $9.8 \text{ m s}^{-2}$ ).

a) NC film

$$m_1 = 0.326 \text{ g}, m_2 = 2.934 \text{ g}, F_b = 2.626 \text{ mN}, P = 90.1\%$$

b) P-NC film

$$m_1 = 0.346 \text{ g}, m_2 = 3.094 \text{ g}, F_b = 4.390 \text{ mN}, P = 86.0\%$$

## 10. X-ray photoelectron spectroscopy (XPS) measurements

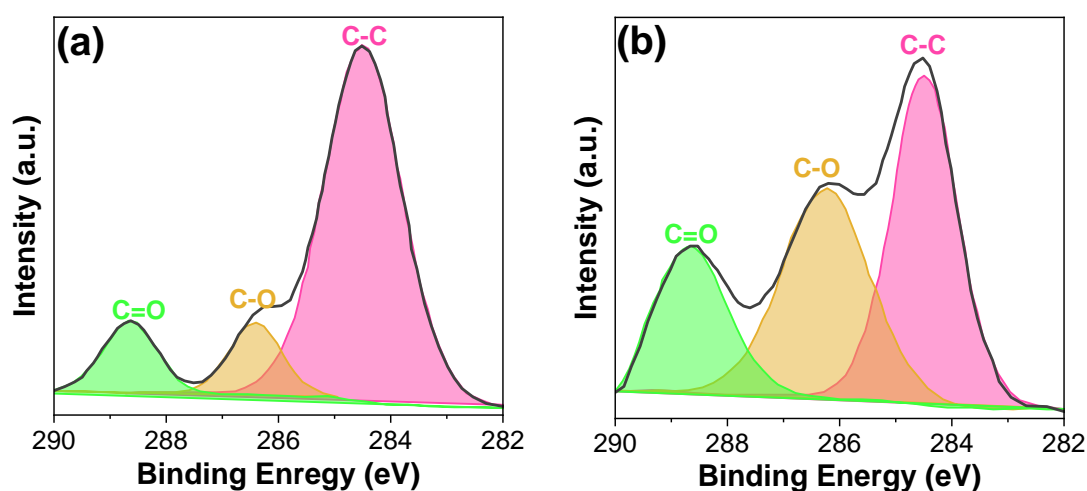

Figure S6. XPS spectra of (a) pristine and (b) O<sub>2</sub> plasma-treated P-NC films.

## 11. Water contact angle (CA) measurements

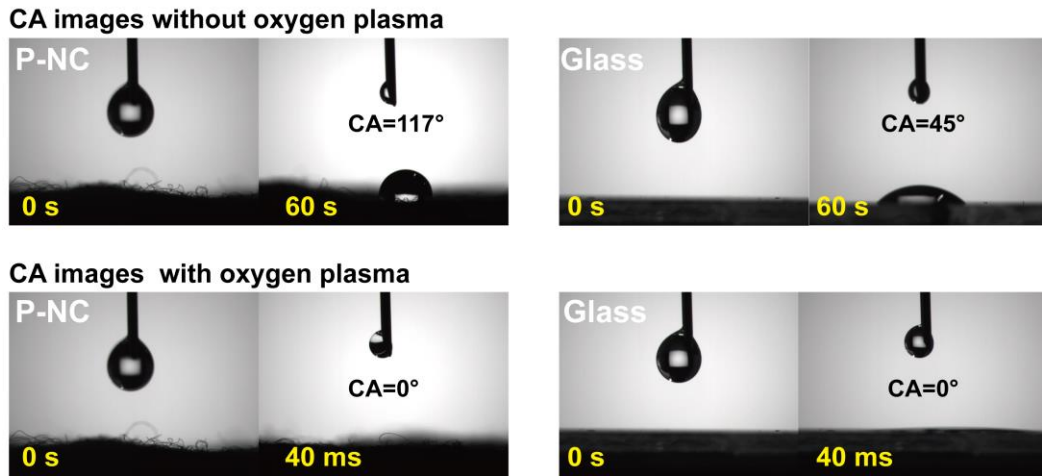

**Figure S7.** CA measurements of P-NC films and glass slices (used for encapsulation of PSCs).

## 12. Thermal conductivity measurements

Thermal conductivities of P-NC films were measured via an IR imaging method.<sup>4</sup> The samples with thickness of  $\sim 3.1$  mm was sandwiched between two 1.1 mm glasses. The sandwich structure was placed between copper plate heated via a solar simulator and a heat sink. The heat transfer rate ( $q$ ) permeating the sample was calculated by using the Fourier Equation S2:

$$q = -k_1 \frac{T_2 - T_1}{d_1} = -k \frac{T_3 - T_2}{d_2} \quad (\text{S2})$$

where  $k$  is the thermal conductivity of the sample,  $k_l$  is the thermal conductivity of glass ( $1.05 \text{ W m}^{-1} \text{ K}^{-1}$ ),<sup>5</sup>  $T_1$ ,  $T_2$ ,  $T_3$  are the average temperature at the interface of copper plate-top glass, top glass-sample, sample-bottom glass, respectively.

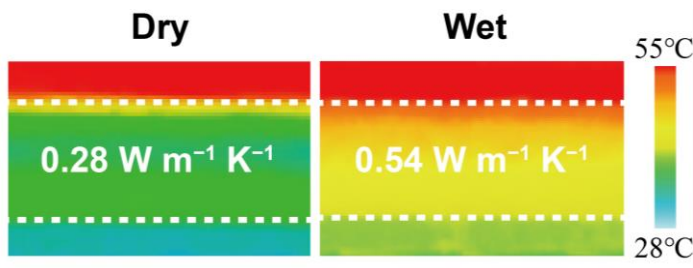

**Figure S8.** Thermal conductivity measurements of P-NC films in dry and wet states.



### 13. Tensile stress–strain measurements

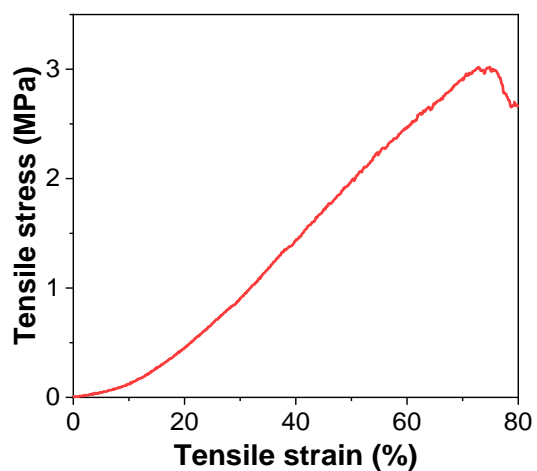

Figure S9. Tensile stress–strain curves of the PN-C film.

### 14. Transmittance spectra of materials

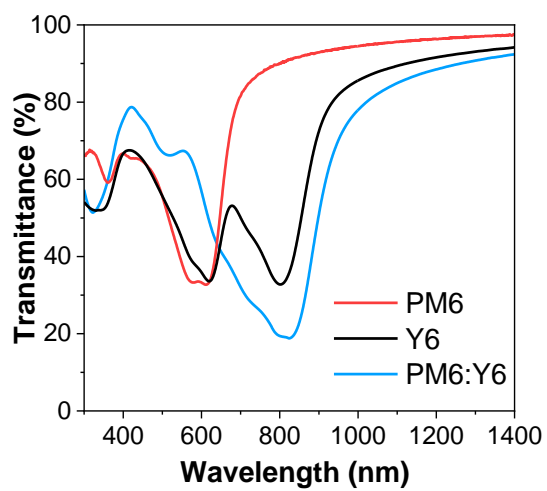

Figure S10. Transmittance spectrum of PM6, Y6 and the blend film.

## 15. Fabrication of opaque PSCs and ST-PSCs

All PSCs were fabricated and tested in a glove box with temperature:  $\sim 22$  °C, oxygen:  $\sim 0.1$  ppm and water:  $\sim 0.1$  ppm. The PSC with a conventional structure of ITO/PEDOT:PSS(CLEVIOS™ P VP AI 4083)/active layer/PDINO/Ag, where PM6 was chosen as the donor material and Y6 was used as an acceptor. The ITO-coated glass substrates were cleaned by detergent, deionized water and isopropyl alcohol under ultrasonication for 10 min each and then dried with nitrogen blow. After 3 min UV ozone treatment, PEDOT:PSS was spin-coated on ITO at 4000 rpm for 30 s and thermal-annealed at 150 °C for 15 min. The PM6:Y6 was optimized at a 1:1.2 wt% ratio and was spin-coated using a CF solution containing 0.5 vol% of 1-chloronaphthalene (CN). The total concentration of solution was fixed as 16 mg/mL. The blend film was spin-coated at 4000 rpm for 30 s and thermal-annealed at 110 °C for 10 min. Then, a methanol solution of PDINO (1 mg/ml) was spin-coated on the active layer at 3000 rpm for 25 s. Finally, Ag (80 nm) was deposited on PDINO via a mask under  $3 \times 10^{-4}$  Pa vacuum. ST-PSCs were fabricated by following a similar procedure with opaque PSCs, where a 15 nm of Ag layer was deposited as top electrode in each device. All PSCs were encapsulated by using ultraviolet-curing epoxy resins and glass slices.

## 16. Device structures and SEM images

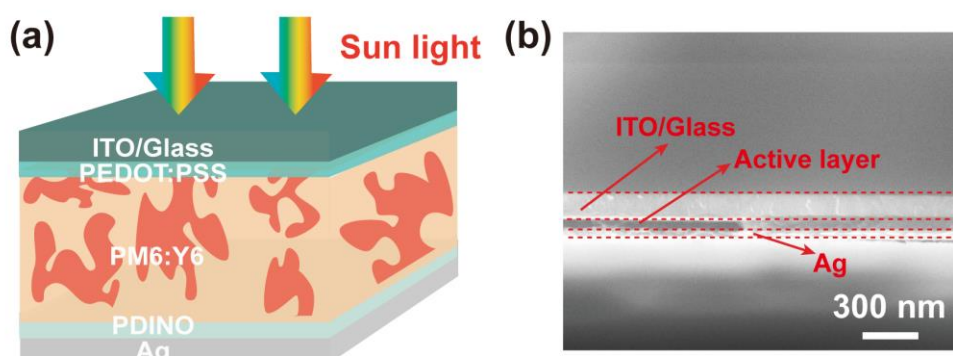

**Figure S11.** (a) Device structure and (b) a cross-sectional SEM image of an opaque PSC.

## 17. CIE chromaticity diagram

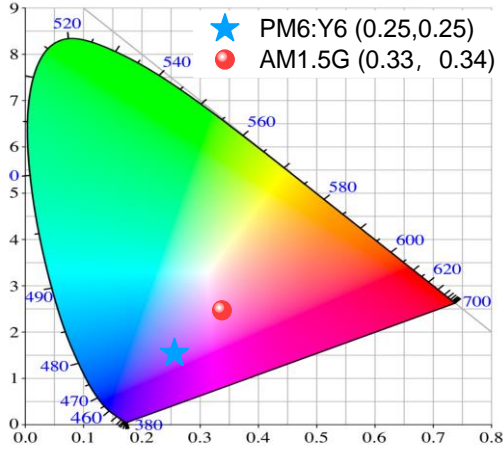

**Figure S12.** CIE chromaticity diagram exhibiting color coordinates of PM6:Y6 based ST-PSC.

## 18. Water evaporation rates and photothermal conversion efficiencies

Water evaporation rates ( $\nu$ ) was calculated by using Equation S3,<sup>6</sup>

$$\nu = \frac{\Delta m}{A \cdot t} \quad (\text{S3})$$

Where  $\Delta m$  is the mass changes over time (kg);  $A$  is the water surface area ( $\text{m}^2$ ) and  $t$  is the time of illumination (h).

The photothermal conversion efficiency ( $\eta$ ) was calculated by using Equation S4,<sup>7</sup>

$$\eta = \Delta m H_{lv} / P_{in} \quad (\text{S4})$$

Where  $\Delta m$  is the mass flux of vapor ( $\text{kg m}^{-2} \text{h}^{-1}$ ) ( $\Delta m = m_{\text{Light}} - m_{\text{Dark}}$ ),  $H_{lv}$  is the liquid-vapor phase change enthalpy ( $H_{lv} = L_v + Q$ ).  $L_v$  is the latent heat of vaporization of water,  $L_v = 1.91846 \times 10^6 [T/(T-33.91)]^2$ , where  $T$  is the temperature of vaporization.  $Q$  is the sensible heat of water of unit mass ( $Q = c (T_2 - T_1)$ ), in which  $c$  is the specific heat of water and can be assumed as a constant ( $4.2 \text{ J g}^{-1} \text{ K}^{-1}$ ),  $T_2$  is the temperature of vaporization and  $T_1$  is the initial temperature of the water.  $P_{in}$  is the intensity of the incident sunlight ( $1000 \text{ W m}^{-2}$ ).

## 19. Water evaporation characterization in the dark

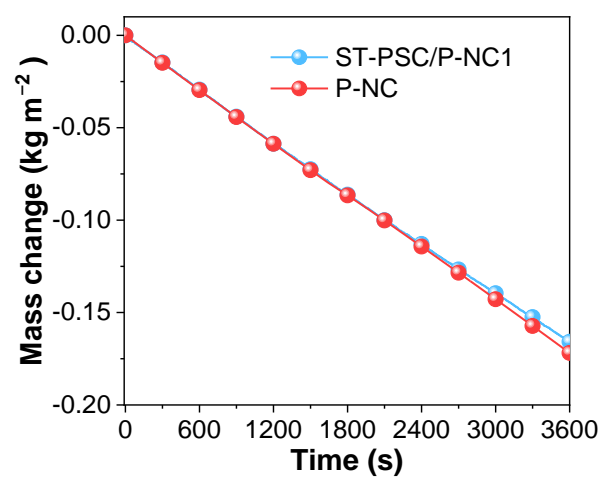

Figure S13. Mass changes of water over time in the dark.

## 20. Summary of synergistic water-electricity production

**Table S1.** Summary of water evaporation rates and electricity generation

| Water-electricity generation | Interfacial water evaporation <sup>a</sup>                 |                                  | Electricity generation <sup>a</sup>               |                                       | Ref. |
|------------------------------|------------------------------------------------------------|----------------------------------|---------------------------------------------------|---------------------------------------|------|
|                              | Evaporation rates<br>(kg m <sup>-2</sup> h <sup>-1</sup> ) | Photothermal efficiencies<br>(%) | Energy harvesting materials                       | Power density<br>(W m <sup>-2</sup> ) |      |
| Photovoltaic                 | >1.64 (1.64) <sup>b</sup>                                  | 126                              | polysilicon                                       | 115.5                                 | 8    |
|                              | 0.80                                                       | 74.6                             | polysilicon                                       | 204                                   | 9    |
|                              | 2.61 (1.08)                                                | 97.4                             | silicon                                           | 200                                   | 10   |
|                              | 0.30                                                       | 20                               | ST-PSC                                            | 64                                    | 11   |
|                              | 0.63                                                       | 42.9                             | ST-PSC                                            | 130                                   | 12   |
|                              | 1.15 (1.10)                                                | 75.0                             | Ag/AgCl                                           | 1                                     | 13   |
|                              | 1.40                                                       | 88.9                             | Ag/AgCl                                           | 1.1                                   | 14   |
|                              | 1.60                                                       | 91                               | CB-SDBS                                           | 6.75×10 <sup>-3</sup>                 | 15   |
| Salinity gradient power      | 1.3                                                        | 83                               | carbon cloth/graphene                             | /                                     | 16   |
|                              | 1.15                                                       | /                                | CNT/PDMS                                          | 4.83×10 <sup>-4</sup>                 | 17   |
|                              | 1.87                                                       | 90.8                             | PVDF                                              | 1.54×10 <sup>-2</sup>                 | 18   |
| Thermoelectric               | 2.07                                                       | 80.2                             | Cu-CAT-1                                          | 1.82×10 <sup>-2</sup>                 | 19   |
|                              | 1.35                                                       | 87.4                             | Bi <sub>2</sub> Te <sub>3</sub>                   | 0.4                                   | 20   |
|                              | 1.26                                                       | 81                               | Bi <sub>2</sub> Te <sub>3</sub>                   | 0.4                                   | 21   |
|                              | 31.6 <sup>c</sup>                                          | 72.7                             | Bi <sub>2</sub> Te <sub>3</sub>                   | 292.9 <sup>c</sup>                    | 22   |
|                              | 0.92                                                       | 58.6                             | Bi <sub>2</sub> Te <sub>3</sub>                   | 0.22                                  | 23   |
|                              | 1.72                                                       | 90                               | Bi <sub>2</sub> Te <sub>3</sub>                   | 0.5                                   | 24   |
| Pyro-piezoelectric           | 1.39 (1.15)                                                | 90                               | PVDF                                              | 2.41×10 <sup>-4</sup>                 | 25   |
| Thermogalvanic               | 1.33 (1.12)                                                | 91.4                             | Cu/Cu <sup>2+</sup>                               | 1.57×10 <sup>-3</sup>                 | 26   |
|                              | 1.1                                                        | 60                               | I <sub>3</sub> <sup>-</sup> /I <sup>-</sup> pairs | ~0.5×10 <sup>-3</sup>                 | 27   |

<sup>a</sup> Water evaporation and electricity generation were measured under 1 sun unless otherwise specified. <sup>b</sup> Water collection rates are given in the parentheses. <sup>c</sup> measured under 30 sun.

## 21. Long-term water evaporation measurements

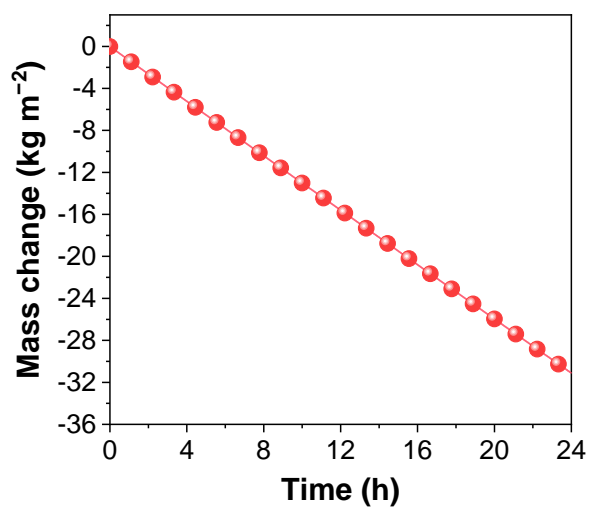

Figure S14. Mass changes of water over 24 h under 1 sun.

## 22. Stability characterization of ST-PSC

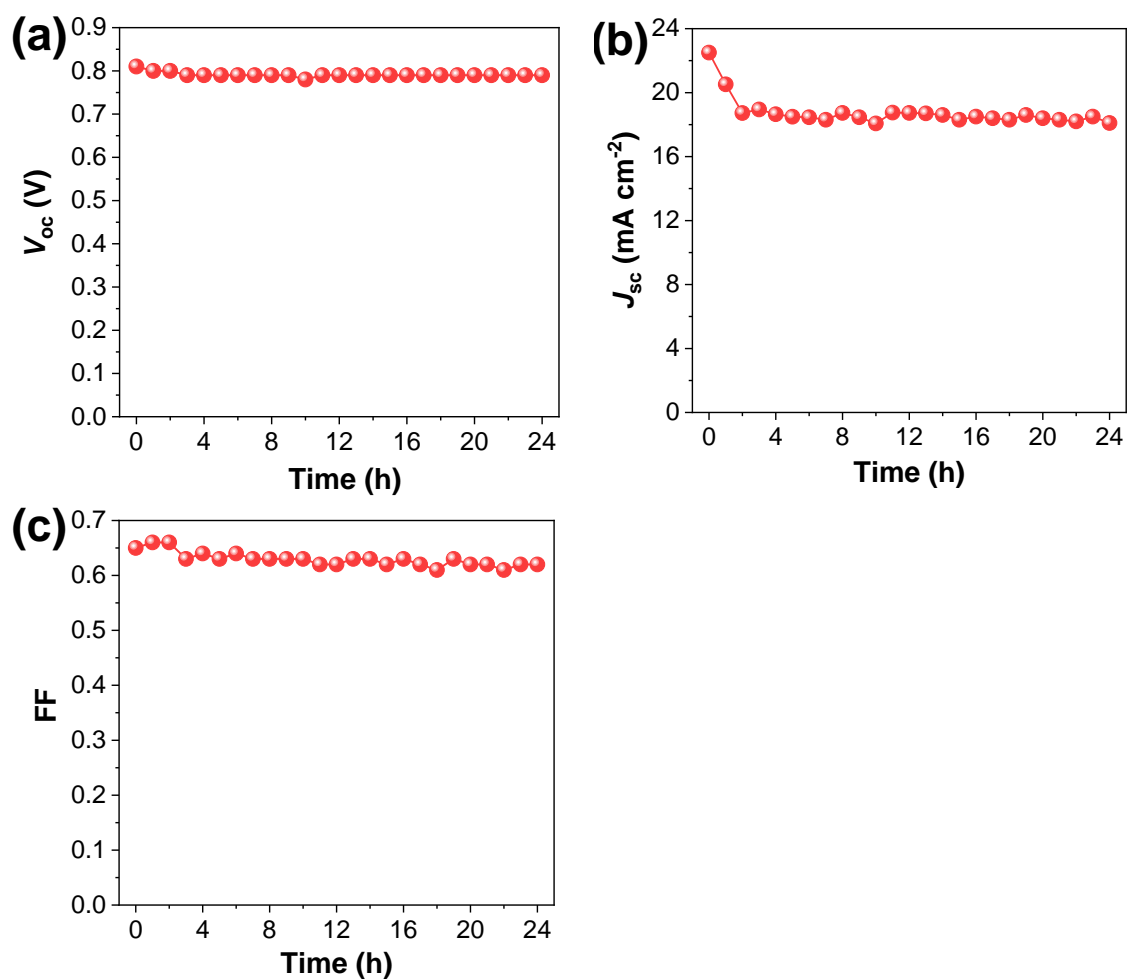

Figure S15. Decay on photovoltaic parameters of ST-PSCs over 24 h under 1 sun.

## 23. Biofouling characterization

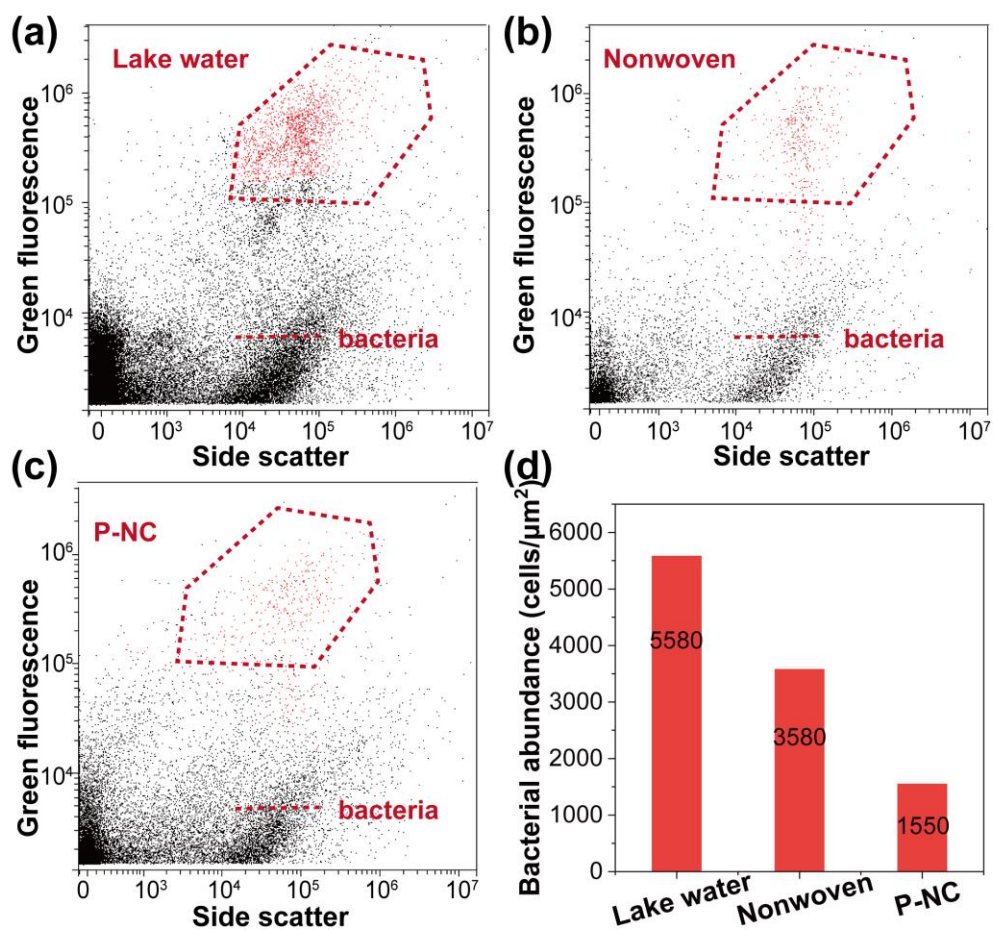

**Figure S16.** Biofouling characterization in (a) lake water; (b) pristine nonwoven; (c) P-NC film and (d) summary of bacterial concentration.

## 24. Salt rejection characterization

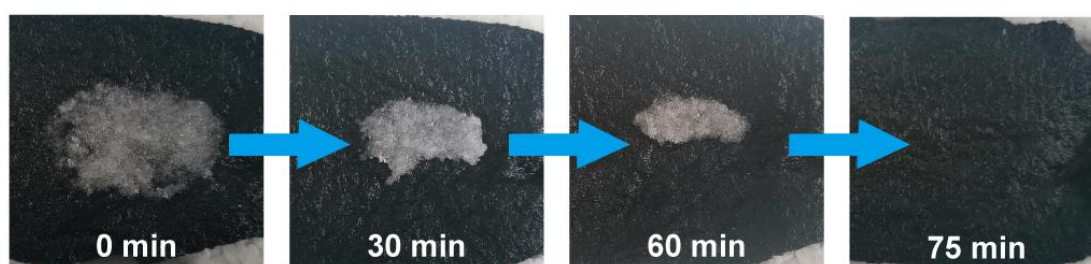

**Figure S17.** Dissolution of salt crystals on top of P-NC.

## 25. ICP-MS measurements

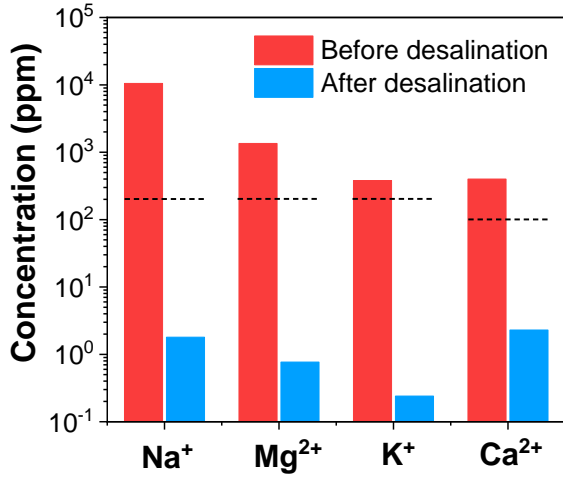

**Figure S18.** Ion concentration before and after desalination (The black lines show WHO quality standards required for drinking water).

## 26. Solar energy transfer and energy loss characterization

### i) Optical loss (Reflection):

The reflection loss is calculated by using Equation S5,

$$R = \frac{\int R(\lambda)S(\lambda)d\lambda}{\int S(\lambda)d\lambda} \quad (\text{S5})$$

where  $\lambda$  is the wavelength range of 300–2500 nm,  $R$  is the reflectance spectrum, and  $S$  is the incident flux of the AM 1.5G solar spectrum.

### ii) Heat loss:

#### a) Radiative loss:

The radiation flux is calculated by using Stefan-Boltzmann law (S6),<sup>28,25</sup>

$$P_{rad} = \varepsilon\delta(T_1^4 - T_2^4) \quad (\text{S6})$$

where  $\varepsilon$  is the emissivity ( $\varepsilon=0.93$ );  $\delta$  represents the Stefan-Boltzmann constant ( $\delta=5.670373 \times 10^{-8} \text{ W m}^{-2} \text{ K}^{-4}$ );  $T_1$  is the surface temperature of PSCs.  $T_2$  is the temperature of



the adjacent environment.

**b) Convective loss:**

The convection loss is calculated by using Newton's law of cooling (S7),<sup>28,29</sup>

$$P_{conv} = h (T_1 - T_2) \quad (S7)$$

where  $h$  is convection heat transfer coefficient (assumed to be  $5 \text{ W m}^{-2} \text{ K}^{-1}$ );  $T_1$  is the surface temperature of PSCs.  $T_2$  is the temperature of the adjacent environment.

**c) Conduction (Heat transfer):**

The conduction heat transferred from PSCs to P-NC is calculated by using Equation S8–S10,<sup>8</sup>

$$Q_A = \alpha Q_s \quad (S8)$$

$$Q_e = \eta Q_A \quad (S9)$$

$$Q_h = Q_A - Q_e \quad (S10)$$

where  $Q_s$  is the intensity of the incident sunlight ( $1000 \text{ W m}^{-2}$ );  $Q_A$  is the solar energy that was captured by PSCs depending on its solar absorptance  $\alpha$  ( $\alpha = 1 - T - R$ );  $Q_e$  is the solar energy that was converted to electricity depending of the efficiencies of PSCs ( $\eta$ );  $Q_h$  represents the rest of the absorbed solar energy that was converted to heat.

## 27. Reflectance spectra of devices

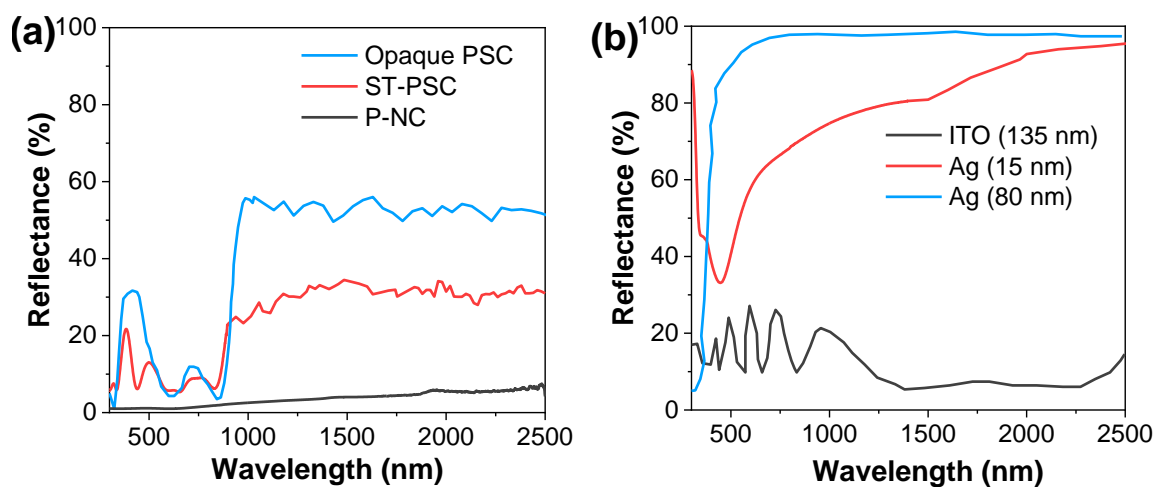

Figure S19. Reflection spectrum of (a) devices and (b) ITO and Ag with different thickness.

## 28. Transmittance spectra of ITO and Ag electrodes

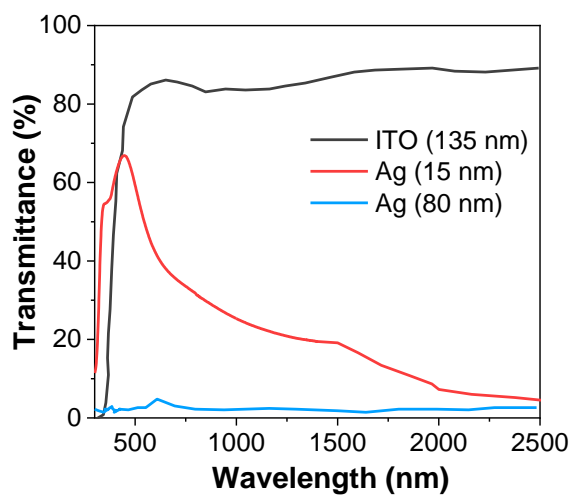

Figure S20. Transmittance spectrum of ITO and Ag with different thickness.

## 29. Water evaporation measurements of ST-PSC/P-NC2.

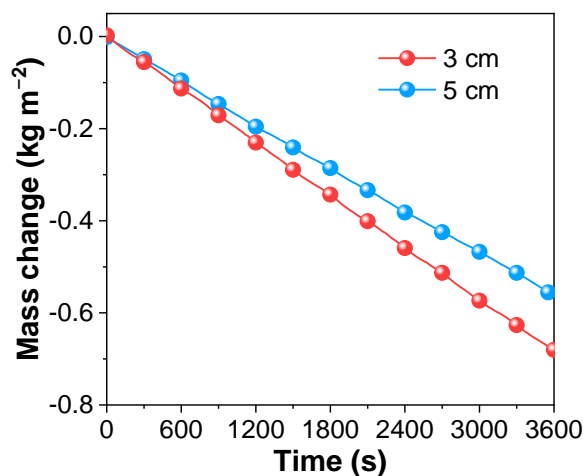

**Figure S21.** Water evaporation rate of hybrid devices containing different distances between ST-PSC and P-NC (measured under 1 sun).

## 30. Solar energy budgets in ST-PSC/P-NC2

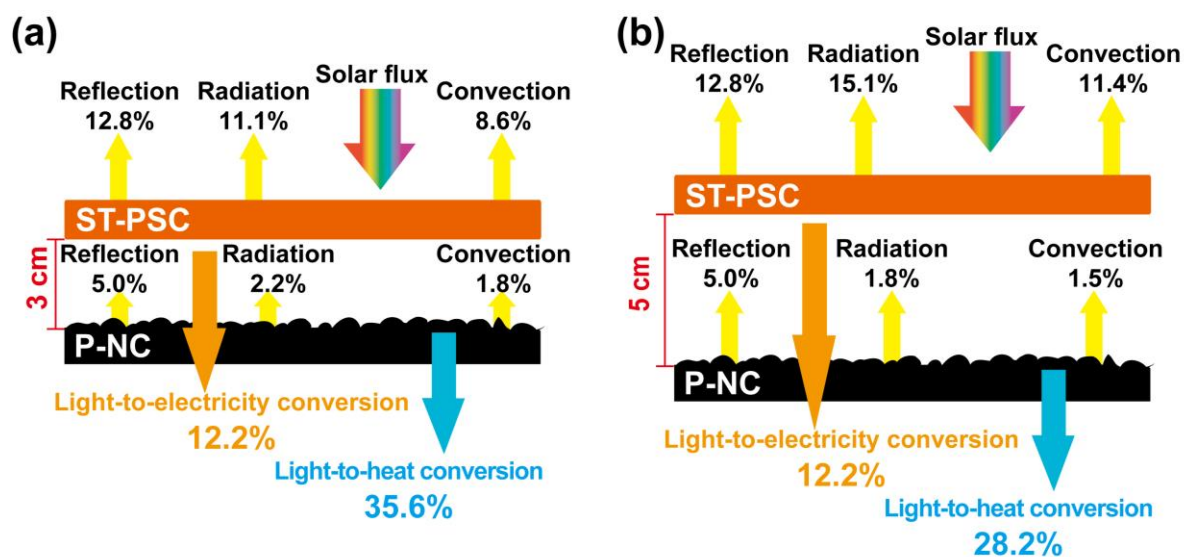

**Figure S22.** Detailed analysis of the energy flows in the hybrid devices containing different distances between ST-PSC and P-NC.

### 31. Near-infrared (IR) images

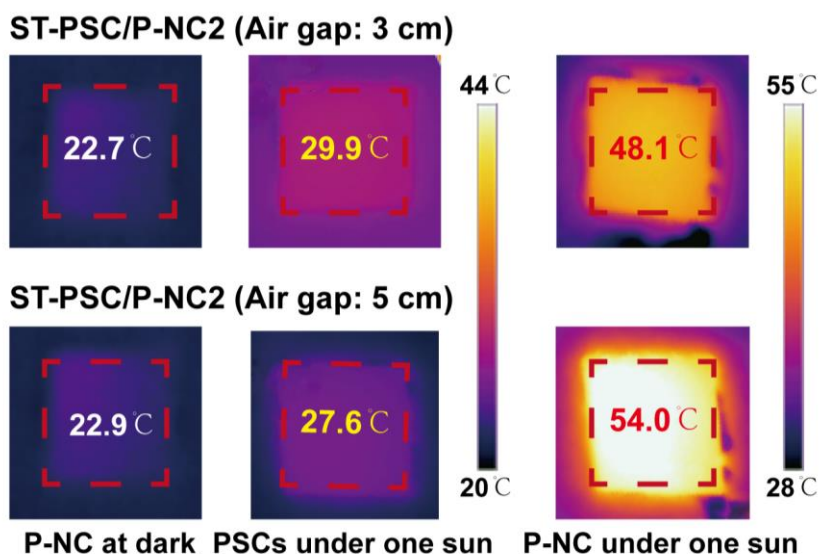

**Figure S23.** IR images of hybrid devices containing different distances between ST-PSC and P-NC (measured under 1 sun).

### 32. Reference

1. D. P. Qian, L. Ye, M. J. Zhang, Y. R. Liang, L. J. Li, Y. Huang, X. Guo, S. Q. Zhang, Z. A. Tan and J. H. Hou, *Macromolecules*, 2012, **45**, 9611-9617.
2. M. J. Zhang, X. Guo, W. Ma, H. Ade and J. H. Hou, *Adv. Mater.*, 2015, **27**, 4655-4660.
3. P. Xiao, J. Gu, C. Zhang, F. Ni, Y. Liang, J. He, L. Zhang, J. Ouyang, S.-W. Kuo and T. Chen, *Nano Energy*, 2019, **65**, 104002.
4. H. R. Li, Y. R. He, Y. W. Hu and X. Z. Wang, *ACS Appl. Mater. Interfaces*, 2018, **10**, 9362-9368.
5. J. L. Wan, A. W. Fan, H. Yao and W. Liu, *Energ. Convers. Manage.*, 2015, **96**, 605-612.
6. Z. Y. Deng, J. H. Zhou, L. Miao, C. Y. Liu, Y. Peng, L. X. Sun and S. Tanemura, *J. Mater. Chem. A*, 2017, **5**, 7691-7709.
7. X. Q. Li, G. Ni, T. Cooper, N. Xu, J. L. Li, L. Zhou, X. Z. Hu, B. Zhu, P. C. Yao and J. Zhu, *Joule*, 2019, **3**, 1798-1803.
8. W. B. Wang, Y. Shi, C. L. Zhang, S. Hong, L. Shi, J. Chang, R. Y. Li, Y. Jin, C. Ong, S. F. Zhuo and P. Wang, *Nat. Commun.*, 2019, **10**, 3012.
9. N. Xu, P. Zhu, Y. Sheng, L. Zhou, X. Li, H. Tan, S. Zhu and J. Zhu, *Joule*, 2020, **4**, 347-358.
10. L. F. Cui, P. P. Zhang, Y. K. Xiao, Y. Liang, H. X. Liang, Z. H. Cheng and L. T. Qu, *Adv. Mater.*, 2018, **30**, 1706805.
11. N. Zhang, G. Chen, Y. Xu, X. Xu and L. Yu, *ACS Appl. Energy Mater.*, 2019, **2**, 6060-6070.
12. N. Zhang, T. Jiang, C. Guo, L. Qiao, Q. Ji, L. Yin, L. Yu, P. Murto and X. Xu, *Nano Energy*, 2020, **77**, 105111.
13. P. Yang, K. Liu, Q. Chen, J. Li, J. Duan, G. Xue, Z. Xu, W. Xie and J. Zhou, *Energy Environ. Sci.*, 2017, **10**, 1923-1927.
14. H. Wang, W. Xie, B. Yu, B. Qi, R. Liu, X. Zhuang, S. Liu, P. Liu, J. Duan and J. Zhou, *Adv. Energy Mater.*, 2021, **11**, 2100481.

15. Y. Zhang, H. Zhang, T. Xiong, H. Qu, J. J. Koh, D. K. Nandakumar, J. Wang and S. C. Tan, *Energy Environ. Sci.*, 2020, **13**, 4891-4902.
16. B. F. Hou, D. N. Kong, J. W. Qian, Y. Yu, Z. Q. Cui, X. H. Liu, J. Y. Wang, T. Mei, J. H. Li and X. B. Wang, *Carbon*, 2018, **140**, 488-493.
17. P. Xiao, J. He, F. Ni, C. Zhang, Y. Liang, W. Zhou, J. Gu, J. Xia, S.-W. Kuo and T. Chen, *Nano Energy*, 2020, **68**, 104385.
18. Z. Li, X. Ma, D. Chen, X. Wan, X. Wang, Z. Fang and X. Peng, *Adv. Sci.*, 2021, **8**, 2004552.
19. X. Ma, Z. Li, Z. Deng, D. Chen, X. Wang, X. Wan, Z. Fang and X. Peng, *J. Mater. Chem. A*, 2021, **9**, 9048-9055.
20. L. L. Zhu, T. P. Ding, M. M. Gao, C. K. N. Peh and G. W. Ho, *Adv. Energy Mater.*, 2019, **9**, 1900250.
21. Y. X. Zhang, S. K. Ravi and S. C. Tan, *Nano Energy*, 2019, **65**, 104006.
22. X. Q. Li, X. Z. Min, J. L. Li, N. Xu, P. C. Zhu, B. Bin Zhu, S. N. Zhu and J. Zhu, *Joule*, 2018, **2**, 2477-2484.
23. X. F. Zhang, W. Q. Gao, X. W. Su, F. L. Wang, B. S. Liu, J. J. Wang, H. Liu and Y. H. Sang, *Nano Energy*, 2018, **48**, 481-488.
24. L. Zong, M. J. Li and C. X. Li, *Nano Energy*, 2018, **50**, 308-315.
25. L. L. Zhu, M. M. Gao, C. K. N. Peh, X. Q. Wang and G. W. Ho, *Adv. Energy Mater.*, 2018, **8**, 323-343.
26. F. L. Meng, M. M. Gao, T. P. Ding, G. Yilmaz, W. L. Ong and G. W. Ho, *Adv. Funct. Mater.*, 2020, **30**, 2002867.
27. Q. C. Shen, Z. Y. Ning, B. W. Fu, S. Ma, Z. Y. Wang, L. Shu, L. F. Zhang, X. Y. Wang, J. L. Xu, P. Tao, C. Y. Song, J. B. Wu, T. Deng and W. Shang, *J. Mater. Chem. A*, 2019, **7**, 6514-6521.
28. F. Ni, P. Xiao, N. X. Qiu, C. Zhang, Y. Liang, J. C. Gu, J. Y. Xia, Z. X. Zeng, L. P. Wang, Q. J. Xue and T. Chen, *Nano Energy*, 2020, **68**, 104311.
29. H. Ghasemi, G. Ni, A. M. Marconnet, J. Loomis, S. Yerci, N. Miljkovic and G. Chen, *Nat. Commun.*, 2014, **5**, 4449.
